# Supplementary material for: Certified reference materials for testing of the presence/absence of Staphylococcus aureus enterotoxin A (SEA) in cheese
Source: PubMed Central journal article supplement (PMC4939153; doi:10.1007/s00216-016-9642-5), 2016-05-24
Supplement: 216_2016_9642_MOESM1_ESM.pdf [file 216_2016_9642_MOESM1_ESM.pdf]

**Certified reference materials for testing of the presence/absence of *Staphylococcus aureus* enterotoxin A (SEA) in cheese**

R. Zeleny, Y. Nia, H. Schimmel, I. Mutel, J.-A. Hennekinne, H. Emteborg, J. Charoud-Got, F. Auvray

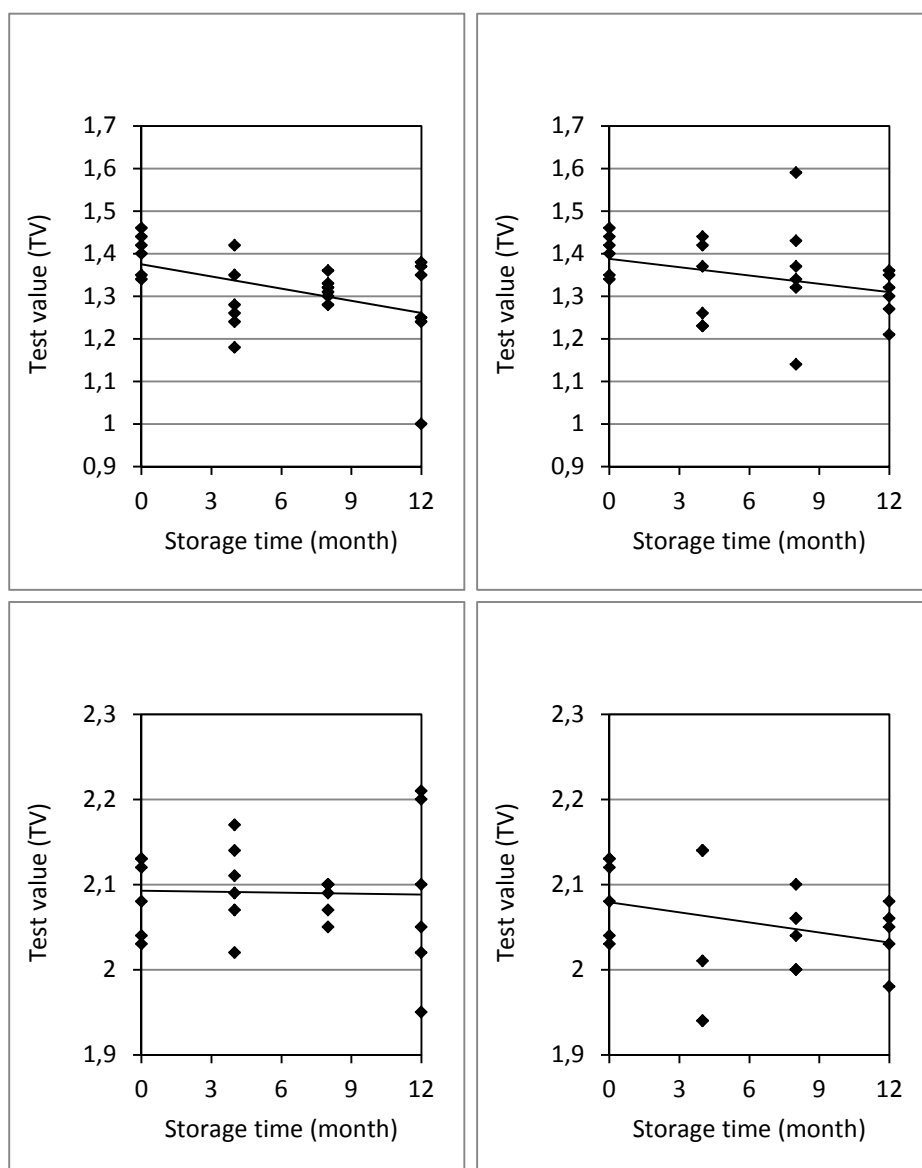

**Fig. S1.** Results of the one-year stability study of IRMM-359b and IRMM-359c using the ESM/VIDAS for analysis. The obtained results per individual time point and the respective regression lines are shown. Upper part: IRMM-359b, storage temperature 4°C (left) and -20 °C (right). Lower part: IRMM-359c, storage temperature 4°C (left) and -20 °C (right)

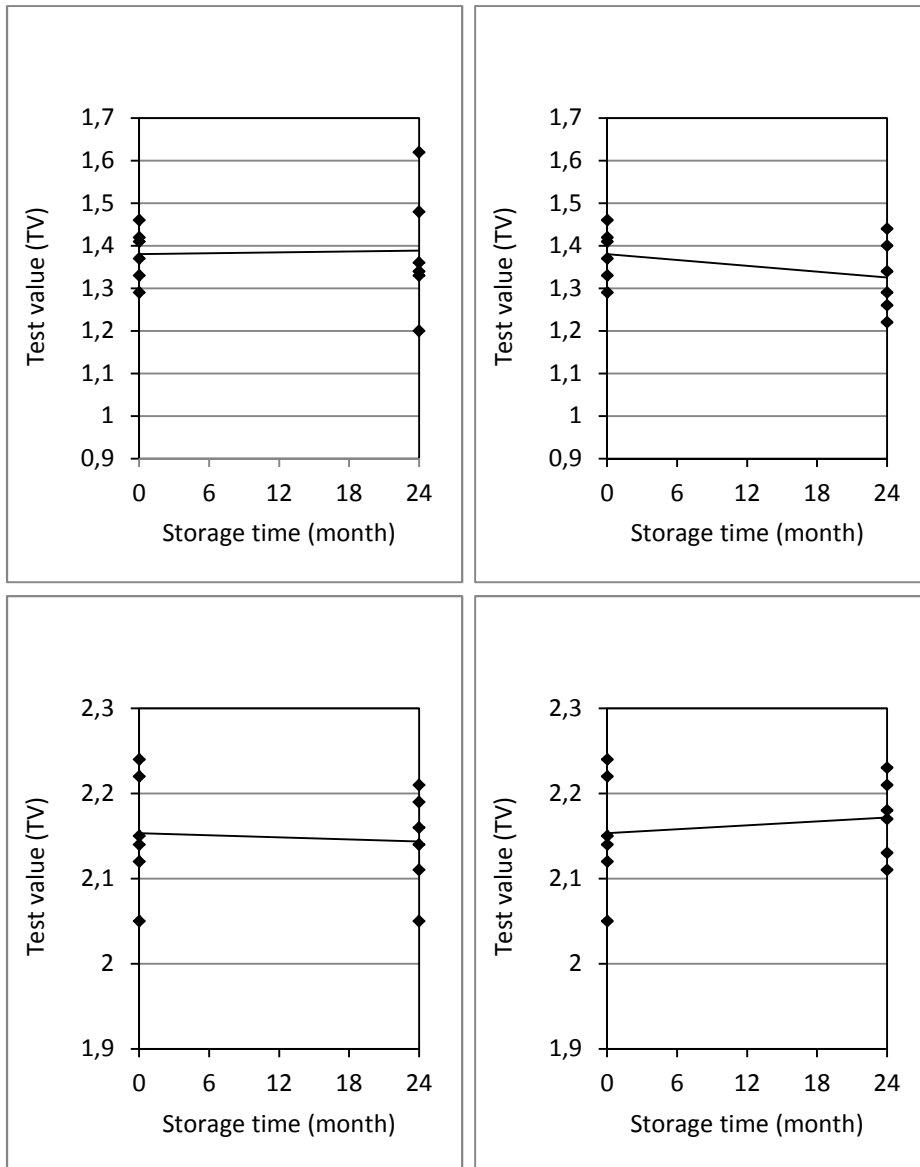

**Fig. S2.** Results of the 2-year stability study of IRMM-359b and IRMM-359c using the ESM/VIDAS for analysis. The obtained results per individual time point and the respective regression line are shown. Upper part: IRMM-359b, storage temperature 4<sup>0</sup>C (left) and -20<sup>0</sup>C (right). Lower part: IRMM-359c, storage temperature 4<sup>0</sup>C (left) and -20<sup>0</sup>C (right)
